# Supplementary material
Source: publisher figshare collection journal article supplement (https://frontiersin.figshare.com/ndownloader/files/25979630)

Differential correlation

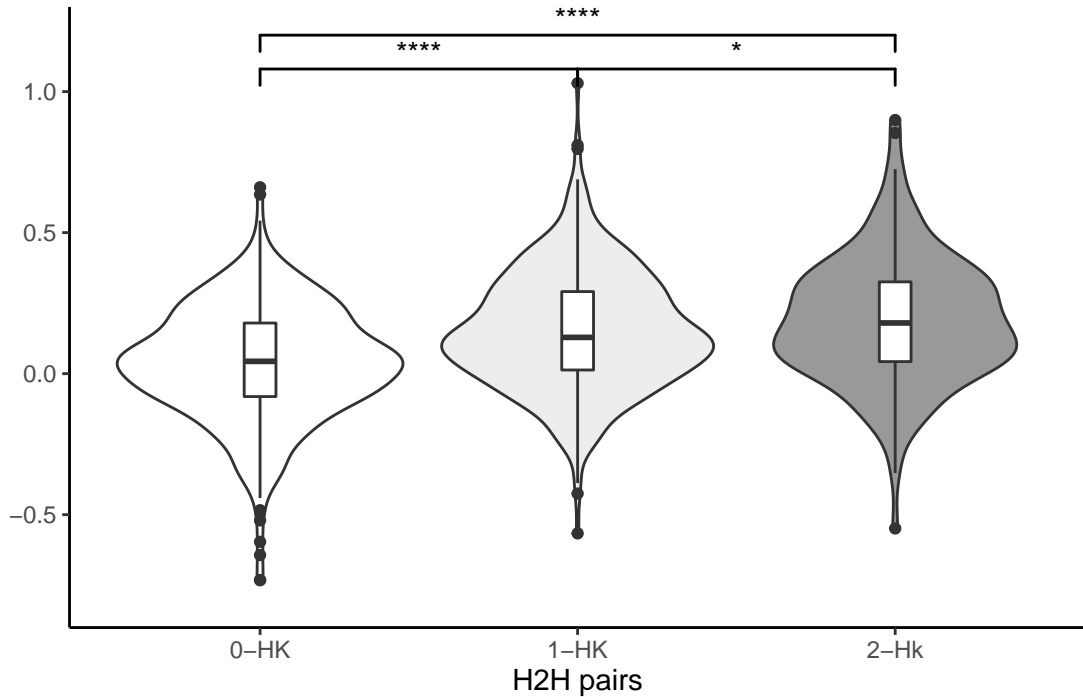

Supplement: Supplementary file [file 25979630]
